# Supplementary material for: Ablative margin quantification using deformable versus rigid image registration in colorectal liver metastasis thermal ablation: a retrospective single-center study
Source: Springer Nature journal article supplement (doi:10.1007/s00330-024-10632-8), 2024-02-09

# Supplementary figure 1. Prognostic performance of predicting residual tumor and two-year local tumor progression

After excluding tumors which were followed in less than two years without local tumor progression, only 97 tumors were analyzed. The area under the receiver operating characteristic curve for predicting residual tumor and two-year local tumor progression by minimal ablative margin quantified by deformable versus rigid image registration methods was 0.90 (95% CI: 0.84, 0.96) and 0.72 (95% CI: 0.61, 0.83), respectively ( $P < 0.001$ ).

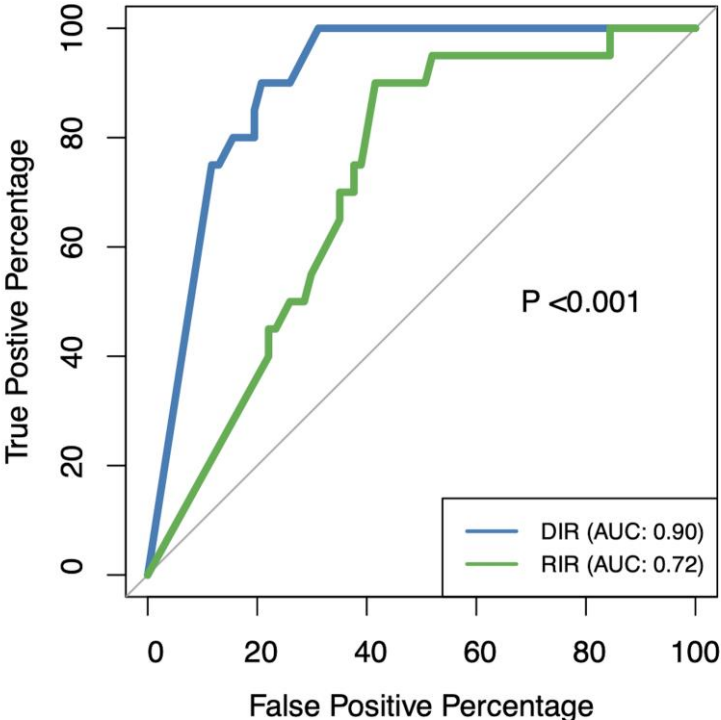

Supplement: 330_2024_10632_MOESM1_ESM.pdf [file 330_2024_10632_MOESM1_ESM.pdf]
